# Supplementary material for: Decentralised treatment solutions for on-site faecal sludge: quantifying the removal efficiencies of two novel systems in an East African city
Source: Royal Society of Chemistry journal article supplement (doi:10.1039/d2ew00718e), 2022-12-19
Supplement: d2ew00718e1.pdf [file d2ew00718e1.pdf]

1 **Decentralised treatment solutions for on-site faecal**  
2 **sludge: quantifying removal efficiencies of two novel**  
3 **systems in an East African city**

4 **Beda Levira**<sup>1</sup>, **Laura Bright-Davies**<sup>2</sup>, **Jutta Carmargo**<sup>2,5</sup>, **Larissa Duma**<sup>2,4</sup>, **Tim Fettback**<sup>2</sup>,  
5 **Alfred Lazaro**<sup>1</sup>, **Clarence Mahundo**<sup>1</sup>, **Fatuma Matwewe**<sup>1</sup>, **Emmanuel Mrimi**<sup>1,6,7</sup>, **Andreas**  
6 **Schmidt**<sup>2,5</sup>, and **Jacqueline Thomas**<sup>1,3,\*</sup>

7

8 **SUPPLEMENTARY MATERIALS**

9

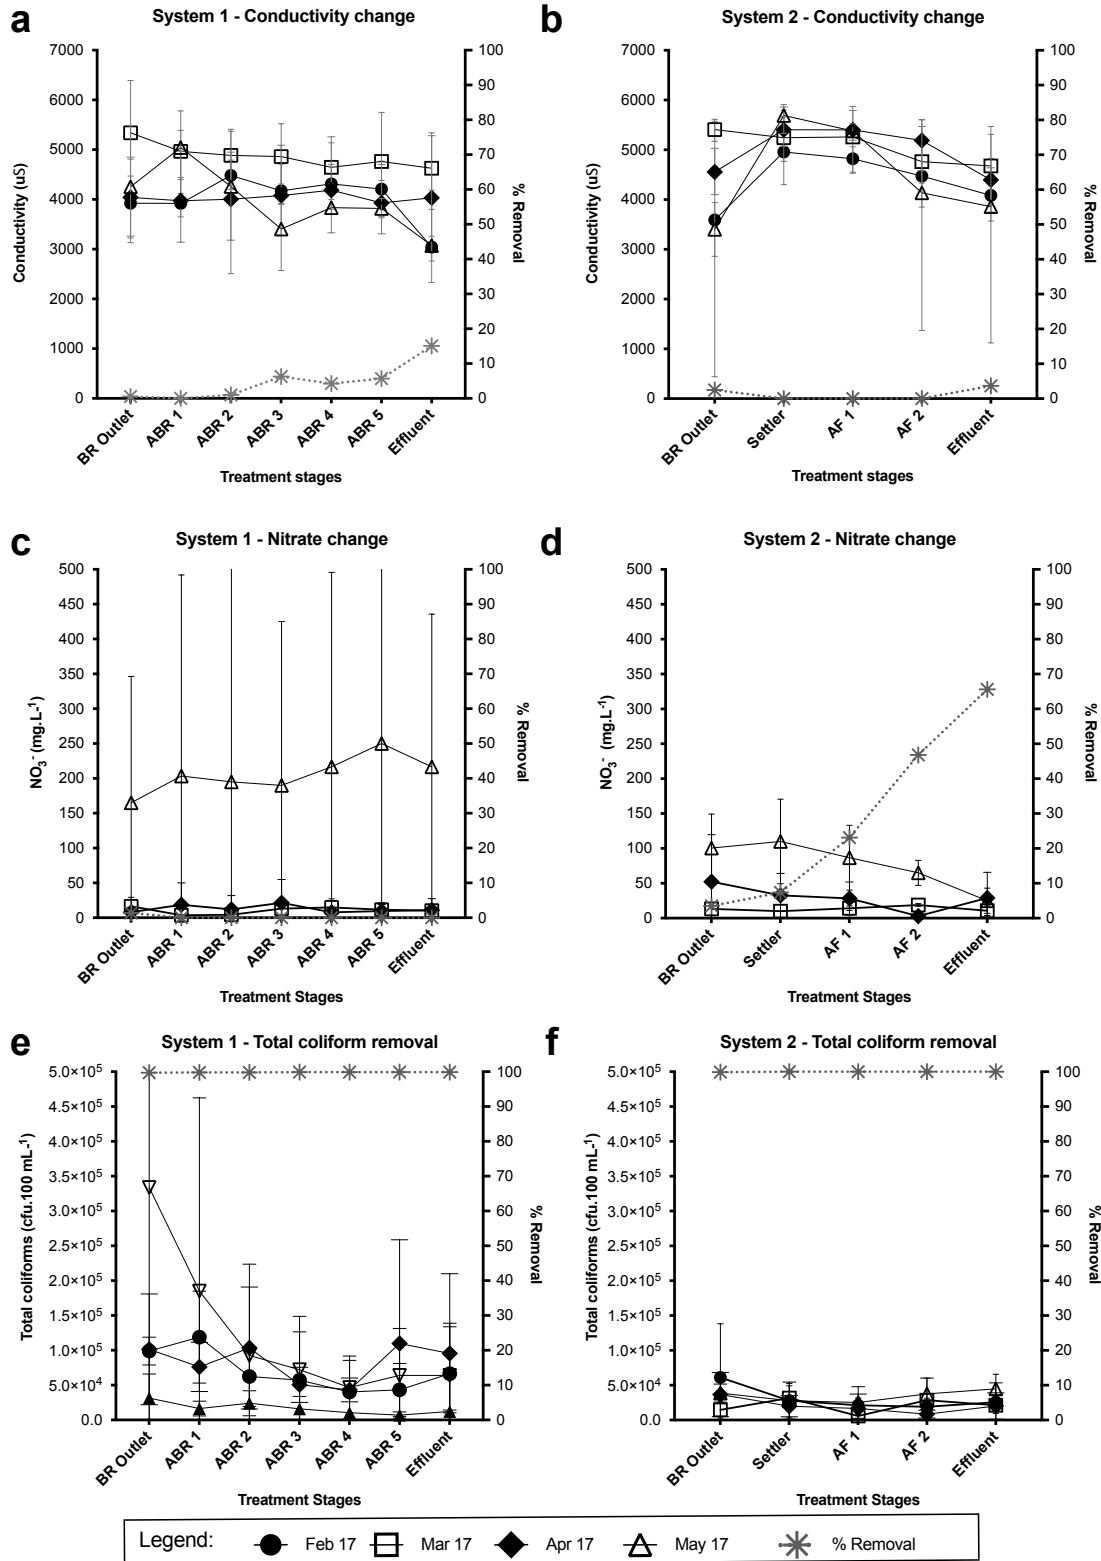

10  
11  
12  
13  
14  
15  
16

**Fig S1.** Monthly conductivity, nitrate and total coliform removal through the treatment stages over four months (February, March, April and May 2017). Line graph for mean parameters (SD as bars) and cumulative percentage removal (dashed line): conductivity for (a) System 1 and (b) System 2; nitrate (NO<sub>3</sub>) for (c) System 1 and (d) System 2; and total coliforms (e) System 1 and (f) System 2

17  
18

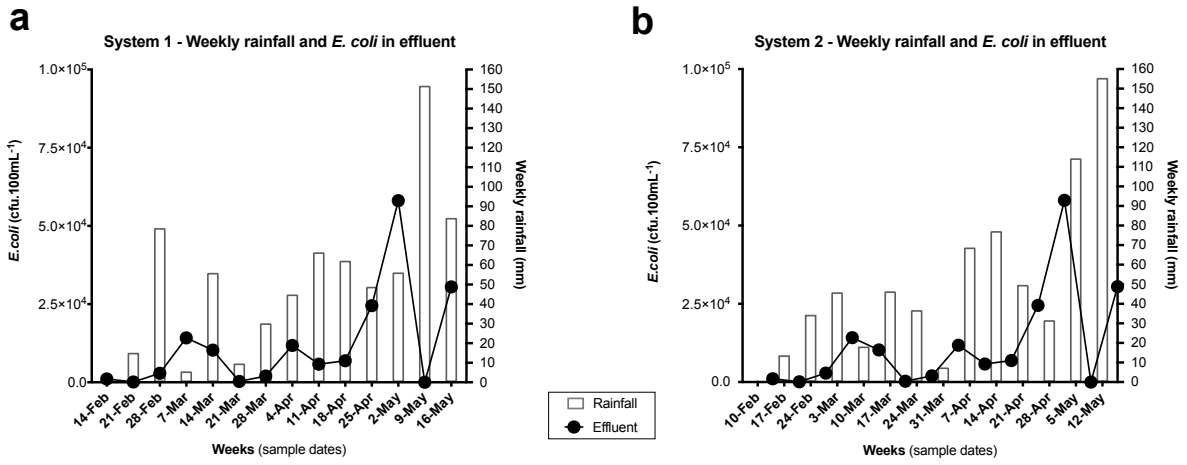

19  
20  
21  
22  
23

**Fig S2.** Relationship between weekly rainfall (white bars) and removal of *E. coli* in the effluent (black symbol) over the sampling period: rainfall and *E. coli* densities for (a) System 1 and (b) System 2
